# Supplementary material
Source: ML conference proceedings conference paper supplement (https://proceedings.mlr.press/v80/xia18a.html)
Supplement: Supplementary file 1 [file xia18a-supp.pdf]

## A. Unfold Architecture of Figure 1 in the Main Paper

The unfold architecture of Figure 1 in the main paper is shown in Figure 1 of Appendix A .

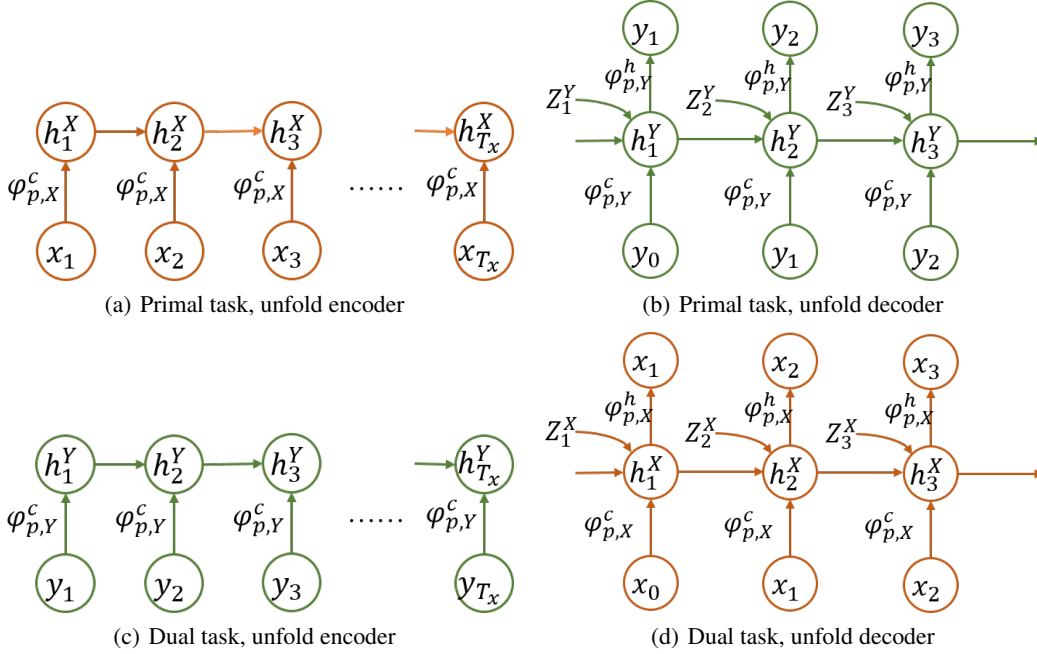

Figure 1. The unfold encoder-decoder framework.

$Z_j^Y$  for any  $j \in [T_y]$  is calculated as:

$$Z_j^Y = \sum_{i=1}^{T_x} \alpha_i h_i^X, \quad \alpha_i = \exp(v^T \tanh(W_x h_i^X + W_y h_{j-1}^Y)) / \sum_{i=1}^{T_x} \exp(v^T \tanh(W_x h_i^X + W_y h_{j-1}^Y)) \quad (1)$$

where  $\alpha_i$  is calculated following (Bahdanau et al., 2015).

$Z_i^X$  for any  $i \in [T_x]$  is calculated as:

$$Z_i^X = \sum_{j=1}^{T_y} \beta_j h_j^Y, \quad \beta_j = \exp(v^T \tanh(W_x h_{i-1}^X + W_y h_j^Y)) / \sum_{j=1}^{T_y} \exp(v^T \tanh(W_x h_{i-1}^X + W_y h_j^Y)). \quad (2)$$

## B. Unfold Architectures of $X$ Component and $Y$ Component in Figure 2 of the Main Paper

The unfold architectures of  $X$  Component and  $Y$  Component in Figure 2 of the main text is shown in Figure 2 of the appendix.  $Z_j^X$  and  $Z_i^Y$  are computed in the same ways as those in Eqn.(1) and Eqn.(2).

## C. How to Build up the Dual Model

(1) *The Encoder.* Set  $\mathcal{C}_Y$  to the null context, i.e.,  $\mathcal{C}_Y = \{0\}$ . At step  $j \in [T_y]$  where  $T_y$  is the length of  $y$ , preprocess  $\mathcal{C}_Y$  and obtain  $Z_j^Y$ :  $Z_j^Y = \varphi_Y^z(h_{j-1}^Y, \mathcal{C}_Y)$ .  $\varphi_Y^z$  is a function that sums up the elements in  $\mathcal{C}_Y$  with adaptive weights. Then, calculate the hidden representation  $h_j^Y = \varphi_Y^h(y, h_{j-1}^Y, Z_j^Y)$ .<sup>1</sup> Eventually, we obtain a set of hidden representations  $h^Y = \{h_j^Y\}_{j=1}^{T_y}$ . The module  $\varphi_Y^h$  in component  $Y$  is not used while encoding  $y \in \mathcal{Y}$ .

(2) *The Decoder.* Set  $\mathcal{C}_X$  to the hidden representations  $h^Y$  obtained in the encoding phase. At step  $i \in [T_x]$ , where  $T_x$  is the length of  $x$ , preprocess  $\mathcal{C}_X$  with the information available at step  $i$  and obtain  $Z_i^X$ :  $Z_i^X = \varphi_X^z(h_{i-1}^X, \mathcal{C}_X)$ . Calculate the

<sup>1</sup>Note that in the encoding phase, all words in  $y$  are available. At step  $j$ ,  $\varphi_Y^z$  and  $\varphi_Y^h$  can consider either  $y_{<j}$  (Bahdanau et al., 2015) or all the  $y_j$ 's (Vaswani et al., 2017).

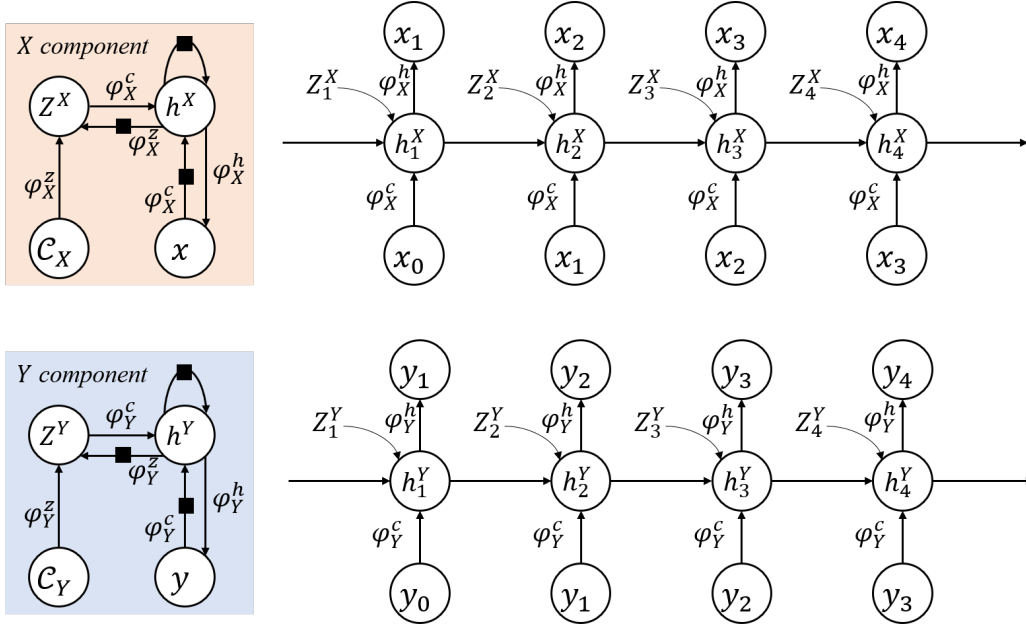

Figure 2. The unfold flow-chart of X component and Y component

hidden representation  $h_i^X = \varphi_X^c(x_{<i}, h_{i-1}^X, Z_i^X)$ . Then map  $h_i^X$  to  $x_i$  by  $x_i = \varphi_X^h(h_i^X)$ . If  $x_i$  is the symbol indicating the end of a sentence, terminate the decoding procedure; otherwise, continue to generate words one by one.

## D. Theoretical Analysis

We give a brief theoretical discussion about model-level dual learning. Note that there are a primal model  $f : \mathcal{X} \rightarrow \mathcal{Y}$  and a dual model  $g : \mathcal{Y} \rightarrow \mathcal{X}$ . The parameters of  $f$  and  $g$  are denoted as  $\theta_f$  and  $\theta_g$  respectively.<sup>2</sup> We take the symmetric setting as an example and the result for the asymmetric setting is similarly obtained.

We want to minimize the (expected) risk of two models  $f$  and  $g$ , which is defined as follows:

$$R(f, g) = \mathbb{E} \left[ \frac{1}{2} (\ell_1(f(x), y) + \ell_2(g(y), x)) \right], \quad (3)$$

$$\forall f \in \mathcal{F}, g \in \mathcal{G},$$

where  $\mathcal{F} = \{f(x; \theta_f); \theta_f \in \Theta_{xy}\}$ ,  $\mathcal{G} = \{g(y; \theta_g); \theta_g \in \Theta_{yx}\}$ ,  $\Theta_{xy}$  and  $\Theta_{yx}$  are parameter spaces, and the  $\mathbb{E}$  is taken over the underlying data distribution  $P$ . The  $\ell_1$  and  $\ell_2$  in Eqn.(3) are loss functions, both of which are mappings  $\mathcal{X} \times \mathcal{Y} \mapsto \mathbb{R}$ .

As shown in Figure 1 of Section 1 at the main text, if we use two individual models to solve a pair of dual tasks, then for the primal task, we need to use a set of parameters  $\varphi_{p,X}^c, \varphi_{p,Y}^c, \varphi_{p,Y}^z, \varphi_{p,Y}^h$ , where the subscript  $p$  stands for ‘‘primal’’. The dual task needs another group of parameters  $\varphi_{d,Y}^c, \varphi_{d,X}^c, \varphi_{d,X}^z, \varphi_{d,X}^h$ , where the superscript  $d$  stands for ‘‘dual’’. By using our proposed method, we actually add the following constraints:

$$\varphi_{p,Y}^c = \varphi_{d,Y}^c; \quad \varphi_{p,X}^c = \varphi_{d,X}^c. \quad (4)$$

Let  $\mathcal{T}$  denote the product space of the two models satisfying Eqn.(4). As a result, the model space of our proposed model-level dual learning is  $(\mathcal{F} \times \mathcal{G}) \cap \mathcal{T}$ , and we briefly denote it as  $\mathcal{H}_1$ .

Define the empirical risk on the  $n$  sample as follows: for any  $f \in \mathcal{F}, g \in \mathcal{G}$ ,

$$R_n(f, g) = \frac{1}{n} \sum_{i=1}^n \frac{1}{2n} (\ell_1(f(x_i), y_i) + \ell_2(g(y_i), x_i)).$$

<sup>2</sup>The parameters  $\theta_f$  and  $\theta_g$  will be omitted when the context is clear.

---

Following (Bartlett & Mendelson, 2002), we introduce Rademacher complexity for our proposed method, a measure for the complexity of the hypothesis.

**Definition 1** Define the Rademacher complexity of our proposed method,  $\mathfrak{R}_n^d$ , as follows:

$$\mathfrak{R}_n^d = \mathbb{E} \left[ \sup_{(f,g) \in \mathcal{H}_1} \frac{1}{2n} \sum_{i=1}^n \sigma_i (\ell_1(f(x_i), y_i) + \ell_2(g(y_i), x_i)) \right],$$

where  $\mathbf{z} = \{z_1, z_2, \dots, z_n\} \sim P^n$ ,  $z_i = (x_i, y_i)$  in which  $x_i \in \mathcal{X}$  and  $y_i \in \mathcal{Y}$ ,  $\boldsymbol{\sigma} = \{\sigma_1, \dots, \sigma_n\}$  are i.i.d sampled with  $P(\sigma_i = 1) = P(\sigma_i = -1) = 0.5$ .

The following theorem generally holds for our proposed method:

**Theorem 1 (Theorem 3.1, (Mohri et al., 2012))** Let  $\frac{1}{2}\ell_1(f(x), y) + \frac{1}{2}\ell_2(g(y), x)$  be a mapping from  $\mathcal{X} \times \mathcal{Y}$  to  $[0, 1]$ . Then, for any  $\delta \in (0, 1)$ , with probability at least  $1 - \delta$ , the following inequality holds for any  $(f, g) \in \mathcal{H}_1$ ,

$$R(f, g) \leq R_n(f, g) + 2\mathfrak{R}_n^d + \sqrt{\frac{1}{2n} \ln\left(\frac{1}{\delta}\right)}. \quad (5)$$

Let  $\mathfrak{R}_n^c$  denote the Rademacher complexity for the standard supervised learning without our proposed method, i.e., no constraint like Eqn.(4) is applied. It is defined as follows:

**Definition 2** Define the Rademacher complexity of conventional learning scheme on the tasks  $\mathfrak{R}_n^c$ , as follows:

$$\mathfrak{R}_n^c = \mathbb{E} \left[ \sup_{(f,g) \in \mathcal{F} \times \mathcal{G}} \frac{1}{2n} \sum_{i=1}^n \sigma_i (\ell_1(f(x_i), y_i) + \ell_2(g(y_i), x_i)) \right],$$

where  $\mathbf{z} = \{z_1, z_2, \dots, z_n\} \sim P^n$ ,  $z_i = (x_i, y_i)$  in which  $x_i \in \mathcal{X}$  and  $y_i \in \mathcal{Y}$ ,  $\boldsymbol{\sigma} = \{\sigma_1, \dots, \sigma_n\}$  are i.i.d sampled with  $P(\sigma_i = 1) = P(\sigma_i = -1) = 0.5$ .

Considering  $\mathcal{H}_1 \in \mathcal{F} \times \mathcal{G}$ , by the definition of Rademacher complexity, we have  $\mathfrak{R}_n^d \leq \mathfrak{R}_n^c$ . Therefore, model-level dual learning has a smaller generation error bound than the conventional supervised learning.

## References

- Bahdanau, D., Cho, K., and Bengio, Y. Neural machine translation by jointly learning to align and translate. *ICLR*, 2015.
- Bartlett, P. L. and Mendelson, S. Rademacher and gaussian complexities: Risk bounds and structural results. *Journal of Machine Learning Research*, 3(Nov):463–482, 2002.
- Mohri, M., Rostamizadeh, A., and Talwalkar, A. *Foundations of machine learning*. MIT press, 2012.
- Vaswani, A., Shazeer, N., Parmar, N., Uszkoreit, J., Jones, L., Gomez, A. N., Kaiser, Ł., and Polosukhin, I. Attention is all you need. In *Advances in Neural Information Processing Systems*, pp. 6000–6010, 2017.
